# Supplementary material for: Genome Wide Association Mapping in Arabidopsis thaliana Identifies Novel Genes Involved in Linking Allyl Glucosinolate to Altered Biomass and Defense
Source: Front Plant Sci. 2016 Jul 12;7:1010. doi: 10.3389/fpls.2016.01010 (PMC4940622; doi:10.3389/fpls.2016.01010)
Supplement: Supplementary file 5 [file Table5.XLSX]

## Sheet: Table_S5
	Table S5. ANOVAs comparing growth and GLS response to the effect of exogenous Allyl GLS between between T-DNA lines from the 13 candidate genes and Col-0. For the analysis, the Genotype term tested for a diference between wild-type and knockout mutant lines, while the impact of more than one independent T-DNA lines per gene were simultaneously tested by the nested factor T-DNA (Genotype). Each ge…
	Individual factor Mean squares (MS), individual factor F values and P values are presented.
		AT1G05680
		T-DNA line was nested within genotype
		Genotype is whether the sample is a wild-type or Knockout mutant
		T-DNA (genotype) is the effect of independent t-DNA mutation line (SALK_001830C, SALK_091130C, SALK_016116C vs Col-0)
		Genotype				T-DNA(Genotype)				Treatment				Genotype x Treatment				T-DNA(Genotype) x Treatment				Experiment
		MS	F Value	Pr > F		MS	F Value	Pr > F		MS	F Value	Pr > F		MS	F Value	Pr > F		MS	F Value	Pr > F		MS	F Value	Pr > F
	Biomass	15.1298	1.02	0.315		21.906	1.47	0.2329		248.845	19.19	0.0001		65.3504	4.22	0.0579		11.1341	0.75	0.475		21.4602	6.72	0.0031
	3MSP	0.0456073	73.43	<.0001		4.917e-05	0.08	0.9239		0.00013021	1.09	0.3096		5.948e-05	0.1	0.7574		8.021e-05	0.13	0.879		0.0049412	41.24	<.0001
	4MSB	2.47306	60.84	<.0001		0.0121136	0.3	0.7428		0.661563	74.97	<.0001		0.00829575	0.2	0.6522		0.0354877	0.87	0.42		0.0126565	1.43	0.2625
	4MSB/4MTB	0.0029923	3.08	0.0814		0.00128797	1.33	0.2688		0.016637	8.59	0.0059		0.0208989	21.52	<.0001		0.00301465	3.1	0.048		0.00074479	4.02	0.0209
	4MTB	0.025267	29.26	<.0001		0.00143819	1.67	0.1928		0.00125	5.56	0.0282		0.00023826	0.28	0.6002		0.00213546	2.47	0.088		0.00105833	4.7	0.0115
	5MSP	0.00480252	59.47	<.0001		2.63e-05	0.33	0.7226		0.00022102	13.96	0.0013		6.222e-05	0.77	0.3816		3.249e-05	0.4	0.6696		0.00089607	56.59	<.0001
	6MSH	7.024e-05	2.28	0.1335		4.243e-05	1.38	0.256		2.763e-05	6.33	0.0205		4.7e-07	0.02	0.9015		3.16e-06	0.1	0.9026		0.00022107	50.66	<.0001
	7MSH	0.00176777	11.81	0.0008		0.00023964	1.6	0.2055		0.00012944	6.35	0.0203		1.45e-06	0.01	0.9218		6.54e-06	0.04	0.9573		0.00106584	52.3	<.0001
	8MSO	0.00557993	3.21	0.0754		0.00328054	1.89	0.1555		0.00062511	1.83	0.1909		0.00090093	0.52	0.4729		0.00034814	0.2	0.8188		0.00298135	8.74	0.0007
	Allyl	0.00223214	5.4	0.0216		0.00059654	1.44	0.2398		0.100128	1766.04	<.0001		0.00562178	3.45	0.0718		0.00058297	1.41	0.2476		7.812e-05	1.38	0.2769
	I3M	0.0124884	18.52	<.0001		6.8e-05	0.1	0.9041		0.00015312	1.22	0.2823		0.00150857	2.24	0.137		0.00063389	0.94	0.3931		0.00662241	12.02	0.0001
	4MOI3M	3.793e-05	1.51	0.2212		2.49e-06	0.1	0.9056		7.812e-05	3.34	0.0817		1.323e-05	0.53	0.4693		1.58e-06	0.06	0.939		2.813e-05	1.2	0.3327
	NMOI3M	0.00025988	1.26	0.2644		7.023e-05	0.34	0.7128		2.813e-05	0.77	0.3897		0.00013422	0.65	0.422		0.00057777	2.79	0.0647		0.00108646	29.8	<.0001
	Short chain	3.44272	64.41	<.0001		0.0124946	0.23	0.7919		0.00195312	3.69	0.0684		0.011381	0.21	0.6452		0.0397056	0.74	0.4776		0.00513646	9.7	0.0003
	Long chain	0.0156561	5.07	0.0259		0.00602676	1.95	0.1459		0.0630125	4.97	0.0368		0.00101809	0.33	0.5668		0.00023453	0.08	0.9269		0.560483	44.23	<.0001
	ShortvsLong	3.75016	57.51	<.0001		0.00549521	0.08	0.9192		0.10125	0.06	0.8031		0.0188523	0.29	0.5917		0.0338257	0.52	0.5964		38.2643	24.09	<.0001
		AT1G18710
		Genotype: Knockout mutant, wild-type (SALK_123009C vs Col-0)
		Genotype				Treatment				Genotype x Treatment				Experiment
		MS	F Value	Pr > F		MS	F Value	Pr > F		MS	F Value	Pr > F		MS	F Value	Pr > F
	Biomass	22.6313	1.46	0.2313		208.82	13.51	0.0005		43.882	2.84	0.0975		117.891	321.06	0.0003
	3MSP	0.005625	42.19	0.0001		0	0	1		2.5e-05	0.19	0.6752		0.00198333	14.88	0.0008
	4MSB	0.6889	92.26	<.0001		0.265225	35.52	0.0002		0.087025	11.66	0.0077		0.0128833	1.73	0.231
	4MSB/4MTB	0.000142	0.09	0.7695		0.025623	14.96	0.0005		0.005613	3.45	0.0711		0.00010625	0.83	0.5115
	4MTB	0.00765625	28.05	0.0005		0.00140625	5.15	0.0494		6.25e-06	0.02	0.8831		0.00027292	1	0.4363
	5MSP	0.0004	24	0.0008		0.0001	6	0.0368		0	0	1		0.00025	15	0.0008
	6MSH	2.5e-05	2.25	0.1679		2.5e-05	2.25	0.1679		0	0	1		0.00011667	10.5	0.0027
	7MSH	0.00050625	17.78	0.0023		0.00015625	5.49	0.0438		6.25e-06	0.22	0.6506		0.00050625	17.78	0.0004
	8MSO	0.0034225	27.38	0.0008		0.001	8	0.0222		2.5e-06	0.02	0.891		0.00080556	6.44	0.0158
	Allyl	6.25e-06	0.07	0.8035		0.0390062	409.99	<.0001		6.25e-06	0.07	0.8035		0.00020625	2.17	0.1617
	I3M	0.00180625	53.08	<.0001		0.00030625	9	0.015		0.00015625	4.59	0.0607		0.00357292	105	<.0001
	4MOI3M	0	0	1		0	0	1		0	0	1		3.333e-05	1.5	0.2797
	NMOI3M	0.00015625	3.46	0.0957		0.00015625	3.46	0.0957		5.625e-05	1.25	0.2932		0.00032292	7.15	0.0093
	Short chain	0.009025	36.51	0.0002		0.0025	10.11	0.0112		0	0	1		0.003075	12.44	0.0015
	Long chain	0.445556	44.31	<.0001		0.00855625	0.85	0.3804		0.00015625	0.02	0.9035		0.189273	18.82	0.0003
	ShortvsLong	78.1456	47.14	<.0001		2.1609	1.3	0.2831		1.07123	0.65	0.4422		13.1422	7.93	0.0068
		AT1G69490
		T-DNA line was nested within genotype
		Genotype is whether the sample is a wild-type or Knockout mutant
		T-DNA (Genotype) is the effect of independent t-DNA mutation line (SALK_019747C, SALK_005010C vs Col-0)
		Genotype				T-DNA(Genotype)				Treatment				Genotype x Treatment				T-DNA(Genotype) x Treatment				Experiment
		MS	F Value	Pr > F		MS	F Value	Pr > F		MS	F Value	Pr > F		MS	F Value	Pr > F		MS	F Value	Pr > F		MS	F Value	Pr > F
	Biomass	128.657	9.48	0.0027		0.0223252	0	0.9677		282.328	20.81	<.0001		50.2152	3.7	0.0572		11.9579	0.88	0.3501		83.6907	6.06	0.0007
	3MSP	0.0334798	44.45	<.0001		0.0011729	1.56	0.2149		9.985e-05	0.13	0.7165		1.43e-06	0	0.9653		0.00142359	1.89	0.1722		0.00468194	27.23	<.0001
	4MSB	1.71192	32.9	<.0001		0.0653061	1.26	0.2652		0.218223	4.19	0.0431		0.0258501	0.5	0.4825		0.0564681	1.09	0.3		0.0215611	2.5	0.0994
	4MSB/4MTB	0.00326708	2.35	0.1283		0.00014028	0.1	0.7514		0.0531666	38.26	<.0001		6.25e-06	0.36	0.5633		3.047e-05	0.02	0.8826		0.0093448	6.43	0.0006
	4MTB	0.0182473	12.83	0.0005		1.8e-05	0.01	0.9106		0.0111158	7.81	0.0062		0.00104075	0.73	0.3944		0.00057069	0.4	0.5279		0.00016111	0.87	0.4767
	5MSP	0.00399759	32.9	<.0001		0.00034359	2.83	0.0957		0.00075228	6.19	0.0145		6.15e-05	0.51	0.4785		0.00012816	1.05	0.3069		0.0006375	12.54	0.0002
	6MSH	1.448e-05	0.37	0.547		9.889e-05	2.49	0.1174		0.00021159	5.34	0.0229		1.093e-05	0.28	0.6008		4.305e-05	1.09	0.2999		0.0001375	7.86	0.0022
	7MSH	0.00088424	4.28	0.0411		0.00046993	2.27	0.1346		0.00069765	3.38	0.0691		2.33e-05	0.11	0.7377		0.00038027	1.84	0.1779		0.00072778	19.26	<.0001
	8MSO	0.00283898	1.33	0.2517		0.0021451	1	0.3187		0.00990521	4.64	0.0337		1.27e-06	0	0.9806		0.00209875	0.98	0.324		0.00120889	3.73	0.0369
	Allyl	0.00310155	4.82	0.0304		0.00014574	0.23	0.6351		0.363811	565.59	<.0001		0.0009	2.59	0.1419		0.00017381	0.27	0.6043		0.00041111	1.92	0.1702
	I3M	0.00911352	11.63	0.0009		9.403e-05	0.12	0.7298		0.0030673	3.91	0.0506		0.00015996	0.2	0.6524		0.00026588	0.34	0.5616		0.00552778	39.17	<.0001
	4MOI3M	6.332e-05	2.82	0.0961		1.05e-06	0.05	0.8293		7.769e-05	3.46	0.0657		1.017e-05	0.45	0.5025		1.2e-07	0.01	0.9423		3.333e-05	1.67	0.2166
	NMOI3M	0.00124207	2.81	0.0969		0.0005088	1.15	0.2861		0.00047696	1.08	0.3016		1.637e-05	0.04	0.8479		0.00036551	0.83	0.3655		0.00158333	31.67	<.0001
	Short chain	2.4168	35.31	<.0001		0.09507	1.39	0.2413		0.254584	3.72	0.0565		0.0280308	0.41	0.5236		0.0821864	1.2	0.2757		0.00258194	4.06	0.0268
	Long chain	0.00753831	1.9	0.1707		0.00607426	1.53	0.2184		0.0197358	4.98	0.0278		8.577e-05	0.02	0.8833		0.0051659	1.3	0.2561		0.483993	20.24	<.0001
	ShortvsLong	208.352	44.33	<.0001		6.31284	1.34	0.2492		1.46524	0.31	0.5778		0.582883	0.12	0.7254		0.0089766	0	0.9652		29.3258	22.11	<.0001
		AT2G44910
		Genotype: Knockout mutant, wild-type (SALK_121097C vs Col-0)
		Genotype				Treatment				Genotype x Treatment				Experiment
		MS	F Value	Pr > F		MS	F Value	Pr > F		MS	F Value	Pr > F		MS	F Value	Pr > F
	Biomass	27.0863	2.29	0.1359		187.425	15.84	0.0002		54.5325	4.61	0.0362		127.69	32.09	0.0088
	3MSP	0.009025	50.77	<.0001		0.0004	2.25	0.1679		0.000225	1.27	0.2897		0.00258333	14.53	0.0009
	4MSB	1.5625	509.51	<.0001		0.297025	96.86	<.0001		0.070225	22.9	0.001		0.00095	0.31	0.8179
	4MSB/4MTB	0.009025	232.07	<.0001		0.007225	185.79	<.0001		0.0064	164.57	<.0001		6.667e-05	1.71	0.2332
	4MTB	0.00050625	9.99	0.0115		0.00015625	3.08	0.113		0.00050625	9.99	0.0115		3.958e-05	0.78	0.5339
	5MSP	0.00075625	16.75	0.0027		0.00030625	6.78	0.0285		5.625e-05	1.25	0.2932		0.00047292	10.48	0.0027
	6MSH	0	0	1		2.5e-05	1.8	0.2126		0	0	1		7.5e-05	5.4	0.0211
	7MSH	0.00030625	17.64	0.0023		0.00030625	17.64	0.0023		6.25e-06	0.36	0.5633		0.00077292	44.52	<.0001
	8MSO	0.00256	19.5	0.0022		0.00064	4.88	0.0582		4e-05	0.3	0.596		0.00094722	7.22	0.0115
	Allyl	0.0001	1.44	0.2608		0.042025	605.16	<.0001		0.0001	1.44	0.2608		0.000175	2.52	0.1237
	I3M	0.00105625	5.12	0.0499		0.00075625	3.67	0.0878		6.25e-06	0.03	0.8657		0.00392292	19.02	0.0003
	4MOI3M	6.25e-06	0.18	0.6783		6.25e-06	0.18	0.6783		6.25e-06	0.18	0.6783		6.25e-06	0.18	0.9048
	NMOI3M	2.5e-05	1	0.3434		0.000225	9	0.015		2.5e-05	1	0.3434		0.000625	25	0.0001
	Short chain	0.0049	18.38	0.002		0.002025	7.59	0.0223		2.5e-05	0.09	0.7664		0.00321667	12.06	0.0017
	Long chain	0.7056	30.27	0.0004		0.075625	3.24	0.1052		0.0289	1.24	0.2944		0.287742	12.34	0.0015
	ShortvsLong	68.8485	51.33	<.0001		0.0410063	0.03	0.8651		0.406406	0.3	0.5954		15.9266	11.87	0.0018
		AT2G45360
		Genotype: Knockout mutant, wild-type (SALK_051976C vs Col-0)
		Genotype				Treatment				Genotype x Treatment				Experiment
		MS	F Value	Pr > F		MS	F Value	Pr > F		MS	F Value	Pr > F		MS	F Value	Pr > F
	Biomass	102.265	6.55	0.0132		205.922	13.2	0.0006		61.2253	4.32	0.0442		84.4168	50.53	0.0046
	3MSP	0.00600625	46.75	<.0001		0.00015625	1.22	0.2987		5.625e-05	0.44	0.5247		0.00273958	21.32	0.0002
	4MSB	0.783225	206.26	<.0001		0.342225	90.13	<.0001		0.050625	13.33	0.0053		0.0121083	3.19	0.0771
	4MSB/4MTB	0.0138063	1.44	0.2612		0.0248062	2.58	0.1425		5.625e-05	0.01	0.0407		0.0219396	2.28	0.1478
	4MTB	0.148225	3.5	0.0943		0.0225	0.53	0.4848		0.013225	0.31	0.5901		0.0965667	2.28	0.1484
	5MSP	0.00075625	43.56	<.0001		0.00015625	9	0.015		6.25e-06	0.36	0.5633		0.00035625	20.52	0.0002
	6MSH	2.5e-05	2.25	0.1679		0	0	1		2.5e-05	2.25	0.1679		0.00011667	10.5	0.0027
	7MSH	0.0001	7.2	0.0251		0.000225	16.2	0.003		0	0	1		0.00064167	46.2	<.0001
	8MSO	0.0003025	0.97	0.354		0.0015625	5	0.0558		1e-05	0.03	0.8625		0.00097222	3.11	0.0885
	Allyl	0.0009	2.59	0.1419		0.050625	145.8	<.0001		0.0009	2.59	0.1419		0.00020833	0.6	0.631
	I3M	0.00180625	16.16	0.003		0.00030625	2.74	0.1323		0.00015625	1.4	0.2674		0.00340625	30.47	<.0001
	4MOI3M	0	0	1		0	0	1		0	0	1		5e-05	3	0.0877
	NMOI3M	2.5e-05	0.69	0.4269		0.0001	2.77	0.1305		0.0001	2.77	0.1305		0.000475	13.15	0.0012
	Short chain	0.00180625	3.12	0.111		0.00275625	4.76	0.0569		6.25e-06	0.01	0.9195		0.00245625	4.25	0.0397
	Long chain	0.378225	39.67	0.0001		0.038025	3.99	0.0769		0.0081	0.85	0.3807		0.244117	25.61	<.0001
	ShortvsLong	28.1165	24.53	0.0008		0.425756	0.37	0.5573		0.0473063	0.04	0.8435		11.7504	10.25	0.0029
		AT3G01970
		Genotype: Knockout mutant, wild-type (GABI_684G12 vs Col-0)
		Genotype				Treatment				Genotype x Treatment				Experiment
		MS	F Value	Pr > F		MS	F Value	Pr > F		MS	F Value	Pr > F		MS	F Value	Pr > F
	Biomass	62.9986	4.35	0.0418		282.156	19.46	<.0001		16.7426	1.15	0.2872		146.743	7.34	0.0679
	3MSP	0.00683952	20.15	0.002		6.265e-05	0.18	0.6788		2.928e-05	0.09	0.7765		0.00264916	7.8	0.0092
	4MSB	0.587223	74.87	<.0001		0.599498	76.44	<.0001		0.00094294	0.12	0.7377		0.00967524	1.23	0.3594
	4MSB/4MTB	6.25e-06	0.01	0.9083		0.0248062	55.73	<.0001		5.625e-05	0.13	0.7304		0.00037292	0.84	0.5065
	4MTB	0.00700835	15.72	0.0042		0.00327668	7.35	0.0266		0.00028433	0.64	0.4476		0.00051097	1.15	0.3878
	5MSP	0.00050285	14.58	0.0051		6.597e-05	1.91	0.204		7.5e-06	0.22	0.6534		0.00035692	10.35	0.004
	6MSH	5.82e-06	0.59	0.4636		8.09e-06	0.82	0.3907		1.6e-07	0.02	0.9014		0.00012822	13.05	0.0019
	7MSH	0.00017712	8.21	0.021		1.424e-05	0.66	0.44		3.766e-05	1.75	0.2229		0.00062992	29.2	0.0001
	8MSO	0.00047429	1.51	0.2535		0.00054697	1.75	0.223		0.00014816	0.47	0.5111		0.00050414	1.61	0.2623
	Allyl	0.00061441	2.42	0.1586		0.046393	182.58	<.0001		0.00071456	2.81	0.1321		0.00020193	0.79	0.5304
	I3M	5.69e-06	0.01	0.9393		0.00297569	3.23	0.1101		0.00151303	1.64	0.2359		0.0045438	4.93	0.0316
	4MOI3M	4.33433e-07	0.04	0.8485		8.03857e-08	0.01	0.9344		1.1412e-07	0.01	0.9218		1.34063e-06	0.12	0.9455
	NMOI3M	0.103339	1.61	0.2397		0.0964652	1.51	0.2546		0.10346	1.62	0.2395		0.0540704	0.84	0.5072
	Short chain	0.00102815	1.62	0.2437		0.00087371	1.38	0.279		0.00037045	0.58	0.4698		0.00162712	2.56	0.1376
	Long chain	0.459006	19.43	0.0017		0.0333063	1.41	0.2655		0.00600625	0.25	0.6262		0.246573	10.44	0.0027
	ShortvsLong	0.00140625	2.78	0.1299		0.00075625	1.49	0.2527		0.00050625	1	0.3434		0.00227292	4.49	0.0345
		At3g03040
		Genotype: Knockout mutant, wild-type (SALK_151533 vs Col-0)
		Genotype				Treatment				Genotype x Treatment				Experiment
		MS	F Value	Pr > F		MS	F Value	Pr > F		MS	F Value	Pr > F		MS	F Value	Pr > F
	Biomass	30.6281	1.94	0.1696		186.355	11.78	0.0011		65.112	5.01	0.0301		82.2716	8.58	0.0554
	3MSP	0.00765625	47.32	<.0001		6.25e-06	0.04	0.8486		5.625e-05	0.35	0.57		0.00228958	14.15	0.0009
	4MSB	1	112.43	<.0001		0.1936	21.77	0.0012		0.1369	15.39	0.0035		0.02745	3.09	0.0827
	4MSB/4MTB	0.002025	5.52	0.0433		0.009025	24.61	0.0008		0.0049	13.36	0.0053		0.00061667	1.68	0.2396
	4MTB	0.00455625	10.63	0.0098		0.00105625	2.47	0.1508		6.25e-06	0.01	0.9065		0.00065625	1.53	0.2722
	5MSP	0.000625	32.14	0.0003		0.0001	5.14	0.0495		0	0	1		0.000425	21.86	0.0002
	6MSH	6.25e-06	1	0.3434		6.25e-06	1	0.3434		6.25e-06	1	0.3434		8.958e-05	14.33	0.0009
	7MSH	0.0001	2.12	0.1796		2.5e-05	0.53	0.4854		0.0001	2.12	0.1796		0.00064167	13.59	0.0011
	8MSO	0.00081	2.95	0.1245		0.0002025	0.74	0.4158		0.0002025	0.74	0.4158		0.00151389	5.51	0.024
	Allyl	0.000225	2.53	0.1461		0.0441	496.12	<.0001		0.000225	2.53	0.1461		0.00018333	2.06	0.1756
	I3M	0.001225	16.33	0.0029		0.000225	3	0.1173		0.000225	3	0.1173		0.003075	41	<.0001
	4MOI3M	0	0	1		0	0	1		0	0	1		1.667e-05	0.6	0.631
	NMOI3M	2.5e-05	0.2	0.6653		0	0	1		0.0004	3.2	0.1073		0.001475	11.8	0.0018
	Short chain	0.0016	2.82	0.1272		0.000625	1.1	0.321		0.000625	1.1	0.321		0.00438333	7.74	0.0073
	Long chain	0.540225	44.12	<.0001		0.003025	0.25	0.6311		0.0025	0.2	0.6621		0.23285	19.02	0.0003
	ShortvsLong	41.0881	33.57	0.0003		0.245025	0.2	0.6651		0.0036	0	0.9579		14.9536	12.22	0.0016
		AT3G16770
		Genotype: Knockout mutant, wild-type (SALK_030459C vs Col-0)
		Genotype				Treatment				Genotype x Treatment				Experiment
		MS	F Value	Pr > F		MS	F Value	Pr > F		MS	F Value	Pr > F		MS	F Value	Pr > F
	Biomass	102.945	6.61	0.0142		217.965	15.97	0.0002		39.8325	2.92	0.0931		128.748	24.13	0.0133
	3MSP	0.0276627	28.45	<.0001		0.00057331	0.59	0.4459		0.00056599	0.58	0.4488		0.0047158	4.85	0.0116
	4MSB	0.714025	93.3	<.0001		0.286225	37.4	0.0002		0.075625	9.88	0.0119		0.00514167	0.67	0.5905
	4MSB/4MTB	0.002888	1.99	0.1661		0.012667	7.25	0.0108		0.00036	0.25	0.6208		0.007365	4.22	0.012
	4MTB	0.005625	72.32	<.0001		0.001225	15.75	0.0033		2.302e-05	0.04	0.8353		0.00020852	0.4	0.6752
	5MSP	0.00335827	20.15	<.0001		0.0003638	2.18	0.1453		8.649e-05	0.52	0.4744		0.00056848	3.41	0.0403
	6MSH	2.848e-05	0.75	0.3901		4.72e-06	0.12	0.7256		2.094e-05	0.55	0.4607		0.00063167	16.65	<.0001
	7MSH	0.00081723	3.98	0.0511		0.00015493	0.75	0.3889		2.05e-06	0.01	0.9208		0.00340498	16.58	<.0001
	8MSO	0.00295944	3.23	0.0778		0.00100648	1.1	0.2991		0.00046877	0.51	0.4774		0.00070988	2.29	0.155
	Allyl	0.00023888	0.45	0.5063		0.161119	302.01	<.0001		0.00023888	0.45	0.5063		0.00105264	1.97	0.1489
	I3M	0.0025	40.91	0.0001		0.0001	1.64	0.2328		0.0004	6.55	0.0308		0.00371667	60.82	<.0001
	4MOI3M	0.00225	9.23	0.0161		1.487e-05	0.42	0.5175		2.32e-06	0.07	0.798		3.216e-05	0.92	0.4055
	NMOI3M	0.104856	1.63	0.2376		0.0983873	1.53	0.2514		0.100399	1.56	0.247		0.0533351	0.83	0.5143
	Short chain	0.00379983	6.08	0.043		0.00073851	1.18	0.3129		0.00024013	0.38	0.5548		0.00247159	3.96	0.061
	Long chain	0.710565	17.25	0.0032		0.128092	3.11	0.1158		0.0439838	1.07	0.3317		0.128971	3.13	0.0874
	ShortvsLong	46.0023	41.79	0.0001		0.00050625	0	0.9834		0.209306	0.19	0.6731		8.47537	7.7	0.0074
		AT3G17520
		Genotype: Knockout mutant, wild-type (SALK_099278C vs Col-0)
		Genotype				Treatment				Genotype x Treatment				Experiment
		MS	F Value	Pr > F		MS	F Value	Pr > F		MS	F Value	Pr > F		MS	F Value	Pr > F
	Biomass	70.3969	5.72	0.0202		202.105	16.42	0.0002		62.3401	4.42	0.0402		103.775	6.83	0.0744
	3MSP	0.005625	56.25	<.0001		0	0	1		2.5e-05	0.25	0.6291		0.00181667	18.17	0.0004
	4MSB	0.652056	30.34	0.0004		0.138756	6.46	0.0317		0.191406	8.9	0.0153		0.0243729	1.13	0.3863
	4MSB/4MTB	0.00105625	2.79	0.1291		0.00600625	15.87	0.0032		0.00765625	20.23	0.0015		0.00035625	0.94	0.4604
	4MTB	0.00455625	12.04	0.0071		0.00015625	0.41	0.5366		0.00050625	1.34	0.2772		0.00027292	0.72	0.5642
	5MSP	0.0004	10.29	0.0107		0.0001	2.57	0.1433		0	0	1		0.00031667	8.14	0.0062
	6MSH	2.5e-05	2.25	0.1679		2.5e-05	2.25	0.1679		0	0	1		0.00011667	10.5	0.0027
	7MSH	0.000225	13.5	0.0051		0.000225	13.5	0.0051		0	0	1		0.00073333	44	<.0001
	8MSO	0.00283361	20.82	0.0018		0.00136111	10	0.0133		3.361e-05	0.25	0.6326		0.00064259	4.72	0.0352
	Allyl	0.00050625	2.75	0.1316		0.0473063	257.06	<.0001		0.00050625	2.75	0.1316		0.00047292	2.57	0.1192
	I3M	0.001225	10.26	0.0108		0.000225	1.88	0.2031		0.000225	1.88	0.2031		0.003475	29.09	<.0001
	4MOI3M	6.25e-06	0.18	0.6783		6.25e-06	0.18	0.6783		6.25e-06	0.18	0.6783		6.25e-06	0.18	0.9048
	NMOI3M	2.5e-05	1	0.3434		0.0004	16	0.0031		0	0	1		0.00084167	33.67	<.0001
	Short chain	0.005625	17.92	0.0022		0.0036	11.47	0.008		0.0001	0.32	0.5862		0.002875	9.16	0.0043
	Long chain	0.469225	34.56	0.0002		0.009025	0.66	0.436		0.0001	0.01	0.9335		0.218617	16.1	0.0006
	ShortvsLong	55.6143	96.82	<.0001		3.60051	6.27	0.0337		2.13891	3.72	0.0857		7.89552	13.75	0.001
		AT3G24460
		Genotype: Knockout mutant, wild-type (SALK_011594C vs Col-0)
		Genotype				Treatment				Genotype x Treatment				Experiment
		MS	F Value	Pr > F		MS	F Value	Pr > F		MS	F Value	Pr > F		MS	F Value	Pr > F
	Biomass	69.285	5.26	0.0256		218.957	16.62	0.0001		62.3045	4.42	0.0401		112.152	20.93	0.0163
	3MSP	0.00600625	29.12	0.0004		5.625e-05	0.27	0.6141		6.25e-06	0.03	0.8657		0.00208958	10.13	0.003
	4MSB	0.916806	102.62	<.0001		0.327756	36.69	0.0002		0.0564062	6.31	0.0332		0.00175625	0.2	0.8961
	4MSB/4MTB	0.00140625	7.42	0.0235		0.0105062	55.42	<.0001		0.00390625	20.6	0.0014		0.00028958	1.53	0.2732
	4MTB	0.00680625	19.41	0.0017		0.00050625	1.44	0.2602		0.00015625	0.45	0.5212		0.00080625	2.3	0.1461
	5MSP	0.0004	6	0.0368		0.000225	3.38	0.0994		2.5e-05	0.38	0.5554		0.00045	6.75	0.0111
	6MSH	2.5e-05	2.25	0.1679		2.5e-05	2.25	0.1679		0	0	1		0.00011667	10.5	0.0027
	7MSH	5.625e-05	2.45	0.1516		0.00015625	6.82	0.0282		6.25e-06	0.27	0.6141		0.00060625	26.45	<.0001
	8MSO	0.00196	5.5	0.047		0.001	2.81	0.1324		1e-05	0.03	0.8711		0.00028056	0.79	0.5339
	Allyl	0.0004	1.45	0.2585		0.046225	168.09	<.0001		0.0004	1.45	0.2585		0.000225	0.82	0.5157
	I3M	0.0009	3.95	0.0781		0.000625	2.74	0.132		2.5e-05	0.11	0.748		0.00363333	15.95	0.0006
	4MOI3M	6.25e-06	0.27	0.6141		6.25e-06	0.27	0.6141		6.25e-06	0.27	0.6141		3.958e-05	1.73	0.2307
	NMOI3M	6.25e-06	0.08	0.7842		5.625e-05	0.72	0.4191		0.00015625	1.99	0.1918		0.00058958	7.51	0.008
	Short chain	0.004225	6.36	0.0326		0.003025	4.56	0.0616		2.5e-05	0.04	0.8504		0.00204167	3.08	0.0833
	Long chain	0.472656	18.76	0.0019		0.0264062	1.05	0.3326		0.00330625	0.13	0.7255		0.224273	8.9	0.0047
	ShortvsLong	44.0896	97.89	<.0001		0.950625	2.11	0.1802		0.2916	0.65	0.4418		7.94691	17.64	0.0004
		AT4G16780
		T-DNA line was nested within genotype
		Genotype is whether the sample is a wild-type or Knockout mutant
		T-DNA (Genotype) is the effect of each independent t-DNA mutation line (SALK_106790C, SALK_006502 vs Col-0)
		Genotype				T-DNA(Genotype)				Treatment				Genotype x Treatment				T-DNA(Genotype) x Treatment				Experiment
		MS	F Value	Pr > F		MS	F Value	Pr > F		MS	F Value	Pr > F		MS	F Value	Pr > F		MS	F Value	Pr > F		MS	F Value	Pr > F
	Biomass	16.4673	12.27	0.0007		35.2845	18.04	0.0002		48.309	35.99	<.0001		0.781204	0.58	0.4473		16.9945	12.66	0.0006		7.05176	3.61	0.043
	3MSP	0.0645716	72.05	<.0001		1.88e-05	0.02	0.8851		0.00329921	3.68	0.0578		0.00149792	1.67	0.199		0.00295533	3.3	0.0723		0.00257083	21.28	<.0001
	4MSB	3.67598	66.46	<.0001		0.0165308	0.3	0.5858		0.716693	12.96	0.0005		0.229599	4.15	0.0442		0.312838	5.66	0.0192		0.00428194	0.34	0.7978
	4MSB/4MTB	0.0043189	5.78	0.018		0.00114848	1.54	0.2178		0.069635	93.23	<.0001		0.00410911	5.5	0.0209		0.00414668	5.55	0.0204		0.00023889	0.91	0.4591
	4MTB	0.0324329	30.03	<.0001		0.00150522	1.39	0.2405		0.00201191	1.86	0.1753		0.00035903	0.33	0.5655		0.00443699	4.11	0.0453		0.00031528	1.87	0.1781
	5MSP	0.0080522	52.56	<.0001		0.00055036	3.59	0.0608		0.00190796	12.45	0.0006		0.00046056	3.01	0.0859		0.00047551	3.1	0.0811		0.00035972	12.1	0.0003
	6MSH	5.69e-06	0.14	0.7048		4.714e-05	1.2	0.2765		9.252e-05	2.35	0.1285		7.7e-07	0.02	0.8894		1.13e-06	0.03	0.8661		0.00014861	12.44	0.0002
	7MSH	0.00020948	0.98	0.3245		2.06e-06	0.01	0.922		0.00080127	3.75	0.0556		4.041e-05	0.19	0.6646		4.96e-06	0.02	0.8792		0.00098333	36.88	<.0001
	8MSO	0.00114212	0.54	0.466		0.00019688	0.09	0.7619		0.00640653	3	0.0861		0.00024193	0.11	0.737		5.964e-05	0.03	0.8675		0.00209315	9.73	0.001
	Allyl	0.00884686	13.23	0.0004		0.00661635	9.89	0.0022		0.424354	634.57	<.0001		0.00884686	13.23	0.0004		0.00661635	9.89	0.0022		0.00018889	1.24	0.3298
	I3M	0.00771949	9.11	0.0032		0.00113918	1.34	0.2488		0.00644566	7.61	0.0069		6.594e-05	0.08	0.7808		0.00414935	4.9	0.0291		0.00391667	16.79	<.0001
	4MOI3M	8.9e-07	0.03	0.8677		2.199e-05	0.69	0.4082		8.46e-06	0.27	0.6075		3.24e-06	0.1	0.7507		1.97e-06	0.06	0.8039		1.111e-05	0.63	0.6098
	NMOI3M	1.822e-05	0.05	0.825		0.00019714	0.53	0.4676		0.00070082	1.89	0.1722		5e-08	0	0.991		0.00012576	0.34	0.5616		0.00180556	30.66	<.0001
	Short chain	5.11269	68.99	<.0001		0.0002625	0.59	0.5677		0.898128	12.12	0.0007		0.290876	3.93	0.0502		0.403846	5.45	0.0215		0.00412639	9.24	0.001
	Long chain	0.00256574	0.62	0.4312		0.0003788	0.09	0.762		0.0139161	3.39	0.0686		0.00010145	0.02	0.8754		4.299e-05	0.01	0.9187		0.293771	25.96	<.0001
	ShortvsLong	293.908	55.79	<.0001		0.339889	0.06	0.8		4.89213	0.93	0.3375		4.48784	0.85	0.3582		14.7073	2.79	0.0978		18.2985	23.81	<.0001
		AT5G45950
		Genotype: Knockout mutant, wild-type (SALK_082692C vs Col-0)
		Genotype				Treatment				Genotype x Treatment				Experiment
		MS	F Value	Pr > F		MS	F Value	Pr > F		MS	F Value	Pr > F		MS	F Value	Pr > F
	Biomass	43.2915	2.92	0.0931		335.995	22.66	<.0001		7.53378	0.51	0.4789		148.208	16.23	0.0233
	3MSP	0.0272456	24.58	<.0001		0.00015877	0.14	0.7066		0.00015493	0.14	0.71		0.00664596	5.99	0.0045
	4MSB	0.265225	120.1	<.0001		0.714025	323.33	<.0001		0.001225	0.55	0.4754		0.00280833	1.27	0.3415
	4MSB/4MTB	0.00050625	2.52	0.1467		0.0280563	139.8	<.0001		6.25e-06	0.03	0.8638		0.00010625	0.53	0.6732
	4MTB	0.007225	22.42	0.0011		0.003025	9.39	0.0135		0.0004	1.24	0.2941		0.00025	0.78	0.5363
	5MSP	0.00244253	20.88	<.0001		0.00058433	4.99	0.0296		0.00020733	1.77	0.1887		0.0012069	10.31	0.0002
	6MSH	6.02e-06	0.17	0.6812		2.675e-05	0.76	0.3878		2.49e-06	0.07	0.7916		0.00051889	14.71	<.0001
	7MSH	0.00098275	5.08	0.0284		0.00036316	1.88	0.1765		2.681e-05	0.14	0.7113		0.00395821	20.44	<.0001
	8MSO	0.00160444	6.74	0.0318		0.00028444	1.19	0.3063		0.00028444	1.19	0.3063		0.0011287	4.74	0.0349
	Allyl	0.00106599	2.62	0.1111		0.175218	431.32	<.0001		0.00106599	2.62	0.1111		0.00146466	3.61	0.0339
	I3M	0.0113911	9.82	0.0028		0.00264934	2.28	0.1365		1.04e-06	0	0.9763		0.00566998	4.89	0.0112
	4MOI3M	2.53e-06	0.08	0.7809		1.196e-05	0.37	0.5456		3.69e-06	0.11	0.7369		1.099e-05	0.34	0.7133
	NMOI3M	0.00018789	3.58	0.0637		8.321e-05	1.59	0.2132		6.59e-06	0.13	0.7243		0.00023156	4.42	0.0167
	Short chain	0.00156331	3.46	0.1053		0.00131452	2.91	0.1319		0.00102301	2.26	0.1762		0.0023378	5.17	0.0339
	Long chain	34.0764	35.59	0.0002		0.283556	0.3	0.5995		0.936056	0.98	0.3486		10.3539	10.81	0.0024
	ShortvsLong	0.342225	27.1	0.0006		0.042025	3.33	0.1014		0.01	0.79	0.3967		0.209633	16.6	0.0005
		AT5G67370
		Genotype: Knockout mutant, wild-type (SALK_029971C vs Col-0)
		Genotype				Treatment				Genotype x Treatment				Experiment
		MS	F Value	Pr > F		MS	F Value	Pr > F		MS	F Value	Pr > F		MS	F Value	Pr > F
	Biomass	38.9205	2.78	0.1009		99.0125	7.08	0.0102		123.753	8.85	0.0043		143.689	9.65	0.0474
	3MSP	0.00765625	65.24	<.0001		0.00030625	2.61	0.1407		0.00015625	1.33	0.2783		0.00235625	20.08	0.0003
	4MSB	1.05062	391.13	<.0001		0.354025	131.8	<.0001		0.046225	17.21	0.0025		0.00464167	1.73	0.2306
	4MSB/4MTB	0.00180625	7.2	0.025		0.0115563	46.1	<.0001		0.00330625	13.19	0.0055		0.00040625	1.62	0.2523
	4MTB	0.005625	13.5	0.0051		0.0009	2.16	0.1757		2.5e-05	0.06	0.812		0.0007	1.68	0.24
	5MSP	0.0009	54	<.0001		0.0001	6	0.0368		0	0	1		0.00038333	23	0.0001
	6MSH	6.25e-06	0.36	0.5633		5.625e-05	3.24	0.1054		6.25e-06	0.36	0.5633		0.00010625	6.12	0.0148
	7MSH	0.0001	7.2	0.0251		0.000225	16.2	0.003		0	0	1		0.00064167	46.2	<.0001
	8MSO	0.00256	20.48	0.0019		0.0009025	7.22	0.0276		2.5e-06	0.02	0.891		0.00081389	6.51	0.0154
	Allyl	0.0001	1.33	0.278		0.042025	560.33	<.0001		0.0001	1.33	0.278		0.00015833	2.11	0.169
	I3M	0.0009	8.53	0.017		0.0004	3.79	0.0834		0.0001	0.95	0.3558		0.00371667	35.21	<.0001
	4MOI3M	0.0001	3.6	0.0903		2.5e-05	0.9	0.3676		2.5e-05	0.9	0.3676		0	0	1
	NMOI3M	5.625e-05	3.24	0.1054		5.625e-05	3.24	0.1054		0.00015625	9	0.015		0.00067292	38.76	<.0001
	Short chain	0.00525625	18.51	0.002		0.00225625	7.94	0.0201		6.25e-06	0.02	0.8853		0.00327292	11.52	0.002
	Long chain	0.600625	54.6	<.0001		0.0324	2.95	0.1203		0.005625	0.51	0.4927		0.242617	22.06	0.0002
	ShortvsLong	62.2916	71.06	<.0001		0.327756	0.37	0.556		0.0189062	0.02	0.8865		12.1668	13.88	0.001
